# Supplementary material for: New insight into the electronic structure of SiF4: synergistic back-donation and the eighteen-electron rule
Source: Royal Society of Chemistry journal article supplement (doi:10.1039/d2cp01607a), 2022-01-01
Supplement: d2cp01607a1.pdf [file d2cp01607a1.pdf]

## Supporting Information

# **New Insight into the Electronic Structure of SiF<sub>4</sub>: Synergistic Back-Donation and Eighteen- Electron Rule**

*Haoran Wang<sup>a</sup>, Panpan Wu<sup>a</sup>, Zhenyu Wu<sup>a</sup>, Lili Shi<sup>\*a</sup> and Longjiu Cheng<sup>\*a,b</sup>*

*a. Department of Chemistry, Anhui University, Hefei, Anhui 230601, P. R. China, E-mail: [clj@ustc.edu\(L.C.\)](mailto:clj@ustc.edu(L.C.)),  
[llshi@ustc.edu.cn\(L.S.\)](mailto:llshi@ustc.edu.cn(L.S.))*

*b. Key Laboratory of Structure and Functional Regulation of Hybrid Materials (Anhui University), Ministry of Education, Hefei, 230601, P. R. China*

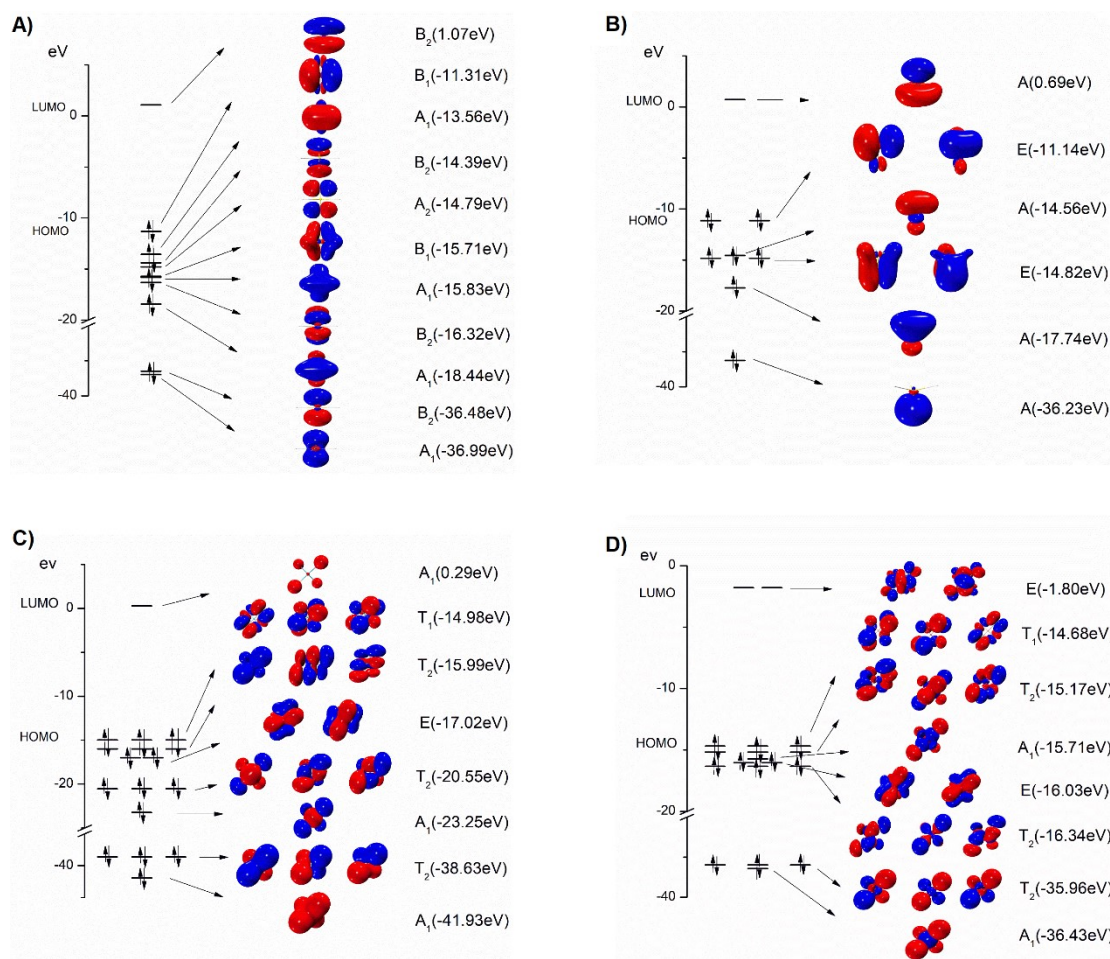

**Figure S1.** The canonical molecular orbitals (CMOs) of A)  $\text{SiH}_2\text{F}_2$  with  $C_{2v}$  symmetry, B)  $\text{SiH}_3\text{F}$  with  $C_{3v}$  symmetry, C)  $\text{CF}_4$  with  $T_d$  symmetry, D)  $\text{TiF}_4$  with  $T_d$  symmetry. The isovalue is 0.03.

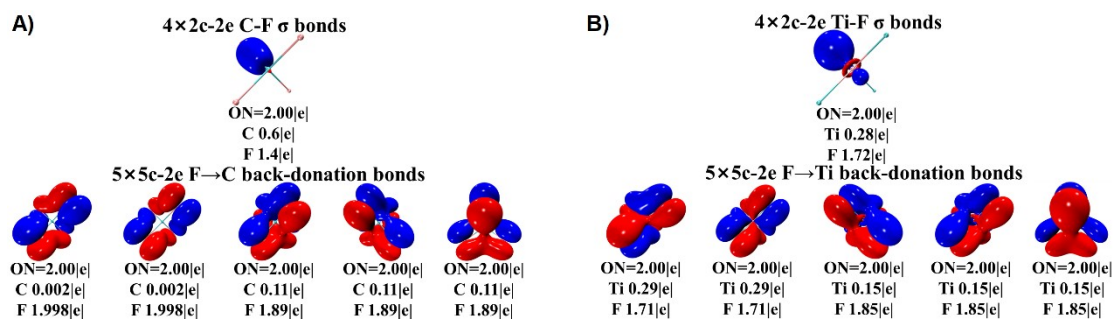

**Figure S2.** AdNDP localized natural bonding orbitals of A)  $\text{CF}_4$  and B)  $\text{TiF}_4$ . ON gives the occupation numbers.

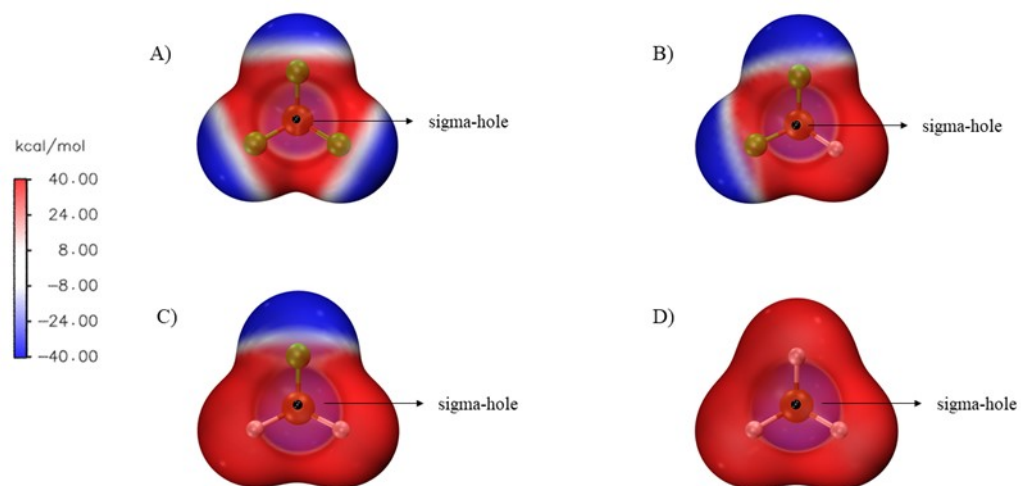

**Figure S3.** Molecular electrostatic potentials drawn over the electronic density surface with an isovalue of 0.001 a.u. for A)  $\text{SiF}_4$  (with four sigma-holes), B)  $\text{SiHF}_3$  (with three sigma-holes), C)  $\text{SiH}_2\text{F}_2$  (with two sigma-holes), D)  $\text{SiH}_3\text{F}$  (with one sigma-hole). The black dot is the sigma-hole. The green represents atom F and the pink represents atom H.

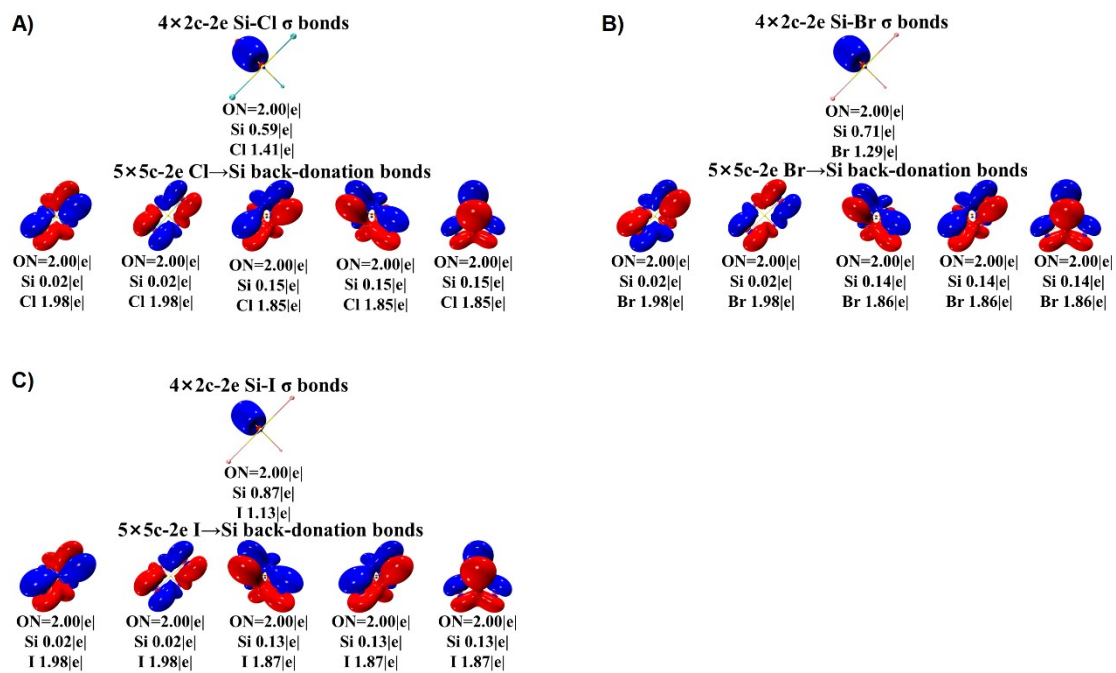

**Figure S4.** AdNDP localized natural bonding orbitals of A)  $\text{SiCl}_4$ , B)  $\text{SiBr}_4$ , C)  $\text{SiI}_4$ . ON gives the occupation numbers.

**Table S1.** The calculated and experimental C-F, Si-F and Ti-F average bond energies (kcal/mol) of CF<sub>4</sub>, SiF<sub>4</sub> and TiF<sub>4</sub>.

| molecules        | theory | experiment*              |
|------------------|--------|--------------------------|
| CF <sub>4</sub>  | 118.60 | 122.80±2.39 <sup>1</sup> |
| SiF <sub>4</sub> | 142.44 | 137.76±4.06 <sup>1</sup> |
| TiF <sub>4</sub> | 136.17 | 135.99±7.89 <sup>1</sup> |

\* The experimental values are average bond energies. They were calculated by this formula:  $BE = (4E_F + E_A - E_{AF_4})/4$  (A=C, Si, Ti) at M06-2X/def2-TZVPP level of theory.

**Table S2.** The total feedback electron number ( $N_e$ ) in 5c-2e bonds for molecules SiX<sub>4</sub> (X=F, Cl, Br, I), CF<sub>4</sub> and TiF<sub>4</sub>.

| molecules | CF <sub>4</sub> | SiF <sub>4</sub> | SiCl <sub>4</sub> | SiBr <sub>4</sub> | SiI <sub>4</sub> | TiF <sub>4</sub> |
|-----------|-----------------|------------------|-------------------|-------------------|------------------|------------------|
| $N_e$     | 0.334           | 0.450            | 0.490             | 0.460             | 0.430            | 1.030            |

## Reference

1. Y.-R. Luo, *Comprehensive handbook of chemical bond energies*, CRC press, 2007, pp 4.
